# Supplementary material for: High-Throughput Screening and Molecular Dynamics Simulation of Natural Product-like Compounds against Alzheimer’s Disease through Multitarget Approach
Source: MDPI journal article supplement (doi:10.3390/ph14090937), 2021-09-18
Supplement: s1 [file s1]

Supplementary files

# High-throughput screening and molecular dynamics simulation of natural product-like compounds against Alzheimer's disease through multitarget approach

Danish Iqbal <sup>1, \*</sup>, Md Tabish Rehman <sup>2</sup>, Abdulaziz Bin Dukhyil <sup>1</sup>, Syed Mohd Danish Rizvi <sup>3</sup>, Mohamed F AlAjmi <sup>2</sup>, Bader Mohammed Alshehri <sup>1</sup>, Saeed Banawas <sup>1,4,5</sup>, M. Salman Khan <sup>6</sup>, Wael Alturaiki <sup>1</sup>, and Mohammed Alsaweed <sup>1</sup>

<sup>1</sup> Department of Medical Laboratory Sciences, College of Applied Medical Sciences, Majmaah University, Majmaah, 11952, Saudi Arabia; [da.mohammed@mu.edu.sa](mailto:da.mohammed@mu.edu.sa) (D.I.), [a.dukhyil@mu.edu.sa](mailto:a.dukhyil@mu.edu.sa) (A.B.D.), [w.alturaiki@mu.edu.sa](mailto:w.alturaiki@mu.edu.sa) (W.T.), [m.alsaweed@mu.edu.sa](mailto:m.alsaweed@mu.edu.sa) (M.A.), [b.alshehri@mu.edu.sa](mailto:b.alshehri@mu.edu.sa) (B.M.A.)

<sup>2</sup> Department of Pharmacognosy, College of Pharmacy, King Saud University, Riyadh 11451, Saudi Arabia; [mrehman@ksu.edu.sa](mailto:mrehman@ksu.edu.sa) (M.T.R.), [malajmij@ksu.edu.sa](mailto:malajmij@ksu.edu.sa) (M.F.A.)

<sup>3</sup> Department of Pharmaceutics, College of Pharmacy, University of Hail, Hail P.O. Box 2240, Saudi Arabia; [sm.danish@uoh.edu.sa](mailto:sm.danish@uoh.edu.sa) (S.M.D.R.)

<sup>4</sup> Health and Basic Sciences Research Center, Majmaah University, Al Majmaah 15341, Saudi Arabia; [s.banawas@mu.edu.sa](mailto:s.banawas@mu.edu.sa) (S.B.)

<sup>5</sup> Department of Biomedical Sciences, Oregon State University, Corvallis, Oregon 97331, United States

<sup>6</sup> Clinical Biochemistry & Natural Product research laboratory, Department of Biosciences, Integral University, lucknow-226026, U.P., India; [contactskhan@gmail.com](mailto:contactskhan@gmail.com) (M.S.K.)

\* Correspondence: [da.mohammed@mu.edu.sa](mailto:da.mohammed@mu.edu.sa)

## Table of Content:

**Figure S1:** (A) Structure of F0850-4777 (3-(2-methoxyphenyl)-4-oxo-4H-chromen-7-yl 4-methylbenzoate), (B) Acceptable range (pink color region) for pharmacokinetics properties of F0850-4777, (C) Description about BOILED-Egg image for F0850-4777 to predict gastrointestinal absorption (HIA) and brain penetration (BBB).

**Figure S2.** RMSF of ligand (F0850-4777) inside the binding pocket of their respective protein targets

**Table S1:** Molecular docking parameters for the interaction of target protein, acetylcholinesterase with F0850-4777 and their respective control ligands.

**Table S2:** Molecular docking parameters for the interaction of target protein, butyrylcholinesterase with F0850-4777 and their respective control ligands.

**Table S3:** Molecular docking parameters for the interaction of target protein, monoamine oxidase-A with F0850-4777 and their respective control ligands.

**Table S4:** Molecular docking parameters for the interaction of target protein, monoamine oxidase-B with F0850-4777 and their respective control ligands.

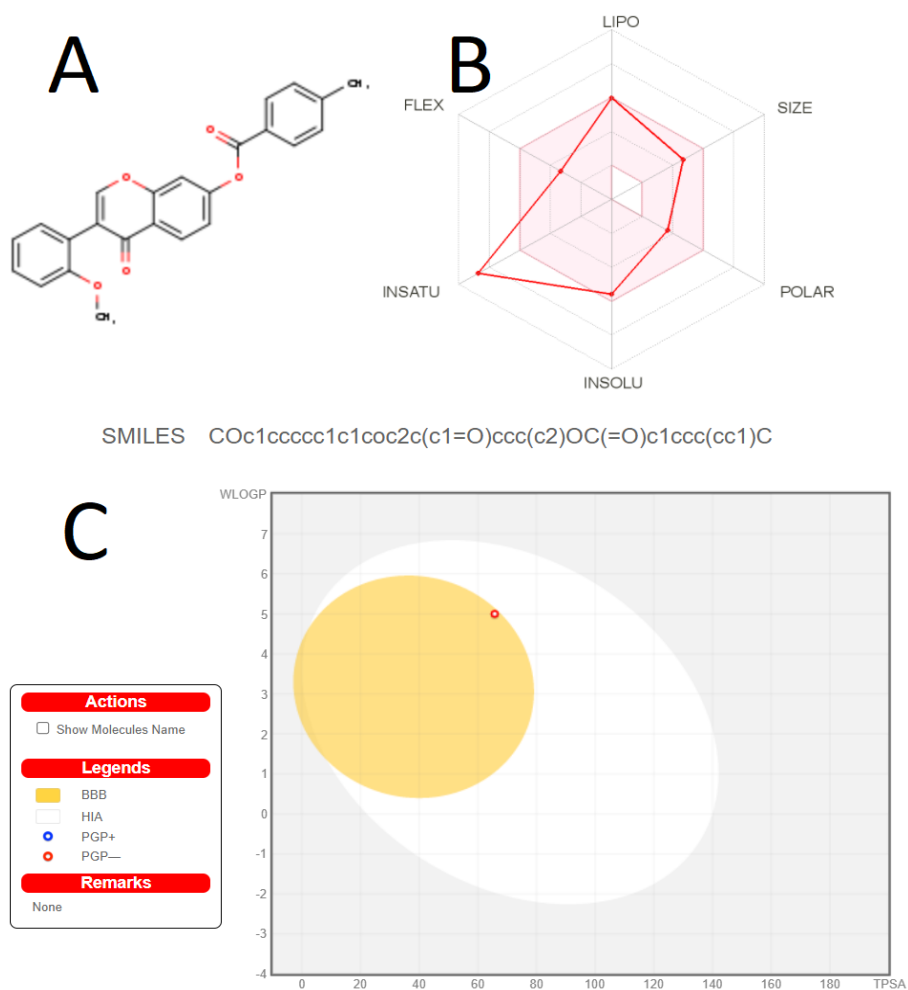

**Figure S1:** (A) Structure of F0850-4777 (3-(2-methoxyphenyl)-4-oxo-4H-chromen-7-yl 4-methylbenzoate), (B) Acceptable range (pink color region) for pharmacokinetics properties of F0850-4777, (C) Description about BOILED-Egg image for F0850-4777 to predict gastrointestinal absorption (HIA) and brain penetration (BBB).

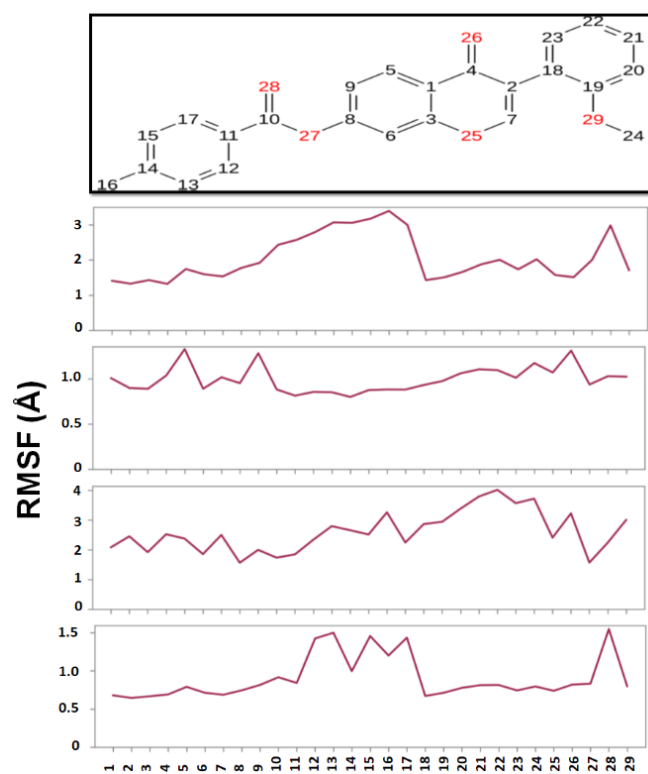

Figure S2. RMSF of ligand (F0850-4777) inside the binding pocket of their respective protein targets

**Table S1:** Molecular docking parameters for the interaction of target protein, acetylcholinesterase with F0850-4777 and their respective control ligands.

| Donor-Acceptor pair            | Distance (Å) | Nature of Interaction        | Docking energy, kcal mol <sup>-1</sup> | Binding affinity, M <sup>-1</sup> |
|--------------------------------|--------------|------------------------------|----------------------------------------|-----------------------------------|
| <i>AChE-Tacrine complex</i>    |              |                              |                                        |                                   |
| LIG:HN - ARG289:O              | 2.2889       | Conventional Hydrogen Bond   | -8.5                                   | 1.72 × 10 <sup>6</sup>            |
| TYR121 - LIG                   | 5.6263       | Hydrophobic (Pi-Pi Stacked)  |                                        |                                   |
| TYR121 - LIG                   | 4.1778       | Hydrophobic (Pi-Pi Stacked)  |                                        |                                   |
| TRP279 - LIG                   | 4.4472       | Hydrophobic (Pi-Pi T-shaped) |                                        |                                   |
| TYR121 - LIG                   | 3.8452       | Hydrophobic (Pi-Alkyl)       |                                        |                                   |
| TRP279 - LIG                   | 4.6750       | Hydrophobic (Pi-Alkyl)       |                                        |                                   |
| <i>AChE-F0850-4777 complex</i> |              |                              |                                        |                                   |
| LIG:C - PHE330                 | 3.4976       | Hydrophobic (Pi-Sigma)       | -12.2                                  | 8.87 × 10 <sup>8</sup>            |
| TRP84 - LIG                    | 4.5801       | Hydrophobic (Pi-Pi Stacked)  |                                        |                                   |
| TRP84 - LIG                    | 4.2239       | Hydrophobic (Pi-Pi Stacked)  |                                        |                                   |
| TYR121 - LIG                   | 3.8900       | Hydrophobic (Pi-Pi Stacked)  |                                        |                                   |
| TYR121 - LIG                   | 5.5085       | Hydrophobic (Pi-Pi T-shaped) |                                        |                                   |
| PHE330 - LIG                   | 4.6986       | Hydrophobic (Pi-Pi T-shaped) |                                        |                                   |
| PHE330 - LIG                   | 5.3491       | Hydrophobic (Pi-Pi T-shaped) |                                        |                                   |
| TYR334 - LIG                   | 5.9813       | Hydrophobic (Pi-Pi T-shaped) |                                        |                                   |
| TYR334 - LIG                   | 5.1634       | Hydrophobic (Pi-Pi T-shaped) |                                        |                                   |
| TYR121 - LIG:C                 | 3.9472       | Hydrophobic (Pi-Alkyl)       |                                        |                                   |
| TRP279 - N:LIG:C               | 4.8095       | Hydrophobic (Pi-Alkyl)       |                                        |                                   |

**Table S2:** Molecular docking parameters for the interaction of target protein, butyrylcholinesterase with F0850-4777 and their respective control ligands.

| Donor-Acceptor pair            | Distance (Å) | Nature of Interaction       | Docking energy, kcal mol <sup>-1</sup> | Binding affinity, M <sup>-1</sup> |
|--------------------------------|--------------|-----------------------------|----------------------------------------|-----------------------------------|
| <i>BChE-Tacrine complex</i>    |              |                             |                                        |                                   |
| LIG:HN - HIS438:O              | 2.0571       | Conventional Hydrogen Bond  | -8.4                                   | 1.45 × 10 <sup>6</sup>            |
| TRP82 - LIG                    | 4.2341       | Hydrophobic (Pi-Pi Stacked) |                                        |                                   |
| TRP82 - LIG                    | 3.6040       | Hydrophobic (Pi-Pi Stacked) |                                        |                                   |
| TRP82 - LIG                    | 3.7794       | Hydrophobic (Pi-Pi Stacked) |                                        |                                   |
| TRP82 - LIG                    | 4.2088       | Hydrophobic (Pi-Pi Stacked) |                                        |                                   |
| HIS438 - LIG                   | 5.7005       | Hydrophobic (Pi-Pi Stacked) |                                        |                                   |
| HIS438 - LIG                   | 5.8765       | Hydrophobic (Pi-Pi Stacked) |                                        |                                   |
| ALA328 - LIG                   | 4.4453       | Hydrophobic (Alkyl)         |                                        |                                   |
| TRP82 - LIG                    | 4.6204       | Hydrophobic (Pi-Alkyl)      |                                        |                                   |
| TRP430 - LIG                   | 5.4972       | Hydrophobic (Pi-Alkyl)      |                                        |                                   |
| <i>BChE-F0850-4777 complex</i> |              |                             |                                        |                                   |
| LIG:C - SER287:O               | 3.6398       | Carbon Hydrogen Bond        | -10.7                                  | 7.04 × 10 <sup>7</sup>            |
| PRO285:CA - LIG                | 3.6622       | Hydrophobic (Pi-Sigma)      |                                        |                                   |
| TRP82 - LIG                    | 3.7792       | Hydrophobic (Pi-Pi Stacked) |                                        |                                   |
| TRP82 - LIG                    | 3.9212       | Hydrophobic (Pi-Pi Stacked) |                                        |                                   |
| TYR332 - LIG                   | 3.8850       | Hydrophobic (Pi-Pi Stacked) |                                        |                                   |
| TYR332 - LIG                   | 4.0772       | Hydrophobic (Pi-Pi Stacked) |                                        |                                   |
| TRP82 - LIG:C                  | 5.1275       | Hydrophobic (Pi-Alkyl)      |                                        |                                   |
| TRP82 - LIG:C                  | 4.1632       | Hydrophobic (Pi-Alkyl)      |                                        |                                   |
|                                |              |                             |                                        |                                   |

**Table S3:** Molecular docking parameters for the interaction of target protein, monoamine oxidase-A with F0850-4777 and their respective control ligands.

| Donor-Acceptor pair      | Distance (Å) | Nature of Interaction       | Docking energy, kcal mol <sup>-1</sup> | Binding affinity, M <sup>-1</sup> |
|--------------------------|--------------|-----------------------------|----------------------------------------|-----------------------------------|
| MAO-A-Harmine complex    |              |                             |                                        |                                   |
| GLY67:CA - LIG:O         | 3.3663       | Carbon Hydrogen Bond        | -8.7                                   | 2.40 × 10 <sup>6</sup>            |
| LIG:C - GLY443:O         | 3.7816       | Carbon Hydrogen Bond        |                                        |                                   |
| TYR407 - LIG             | 4.7765       | Hydrophobic (Pi-Pi Stacked) |                                        |                                   |
| TYR407 - LIG             | 3.8339       | Hydrophobic (Pi-Pi Stacked) |                                        |                                   |
| TYR444 - LIG             | 4.8632       | Hydrophobic (Pi-Pi Stacked) |                                        |                                   |
| LIG - TYR407             | 3.9958       | Hydrophobic (Pi-Pi Stacked) |                                        |                                   |
| LIG - TYR444             | 5.7755       | Hydrophobic (Pi-Pi Stacked) |                                        |                                   |
| MAO-A-F0850-4777 complex |              |                             |                                        |                                   |
| TYR407:HH - LIG:O        | 2.2756       | Conventional Hydrogen Bond  | -13.6                                  | 9.44 × 10 <sup>9</sup>            |
| LIG:C - TYR69:O          | 3.4247       | Carbon Hydrogen Bond        |                                        |                                   |
| CYS323:SG - LIG          | 5.9588       | Pi-Sulfur                   |                                        |                                   |
| CYS406:SG - LIG          | 5.4859       | Pi-Sulfur                   |                                        |                                   |
| TYR407 - LIG             | 3.8042       | Hydrophobic (Pi-Pi Stacked) |                                        |                                   |
| TYR407 - LIG             | 3.9094       | Hydrophobic (Pi-Pi Stacked) |                                        |                                   |
| TYR444 - LIG             | 5.8240       | Hydrophobic (Pi-Pi Stacked) |                                        |                                   |
| LIG:C - VAL210           | 5.0456       | Hydrophobic (Pi-Alkyl)      |                                        |                                   |
| LIG:C - CYS323           | 4.2301       | Hydrophobic (Pi-Alkyl)      |                                        |                                   |
| LIG:C - ILE335           | 5.2395       | Hydrophobic (Pi-Alkyl)      |                                        |                                   |
| LIG:C - LEU337           | 4.4962       | Hydrophobic (Pi-Alkyl)      |                                        |                                   |
| LIG - MET445             | 5.4345       | Hydrophobic (Pi-Alkyl)      |                                        |                                   |
| LIG - ILE335             | 4.2469       | Hydrophobic (Pi-Alkyl)      |                                        |                                   |
| LIG - LEU337             | 5.2089       | Hydrophobic (Pi-Alkyl)      |                                        |                                   |

**Table S4:** Molecular docking parameters for the interaction of target protein, monoamine oxidase-B with F0850-4777 and their respective control ligands.

| Donor-Acceptor pair      | Distance (Å) | Nature of Interaction        | Docking energy, kcal mol <sup>-1</sup> | Binding affinity, M <sup>-1</sup> |
|--------------------------|--------------|------------------------------|----------------------------------------|-----------------------------------|
| MAO-B-Safinamide complex |              |                              |                                        |                                   |
| LIG:H - LEU171:O         | 3.0603       | Conventional Hydrogen Bond   | -9.5                                   | 9.28 × 10 <sup>6</sup>            |
| LIG:H - GLN206:OE1       | 2.7431       | Conventional Hydrogen Bond   |                                        |                                   |
| LEU171:CD2 - LIG         | 3.7261       | Hydrophobic (Pi-Sigma)       |                                        |                                   |
| LIG:C - TYR398           | 3.9522       | Hydrophobic (Pi-Sigma)       |                                        |                                   |
| CYS172:SG - LIG          | 5.0033       | Pi-Sulfur                    |                                        |                                   |
| TYR326 - LIG             | 5.3392       | Hydrophobic (Pi-Pi T-shaped) |                                        |                                   |
| LIG - ILE199             | 4.6594       | Hydrophobic (Pi-Alkyl)       |                                        |                                   |
| LIG - ILE316             | 4.8965       | Hydrophobic (Pi-Alkyl)       |                                        |                                   |
| MAO-B-F0850-4777 complex |              |                              |                                        |                                   |
| TYR435:HH - LIG:O        | 2.8605       | Conventional Hydrogen Bond   | -12.5                                  | 1.47 × 10 <sup>9</sup>            |
| LIG:C - TYR60:O          | 3.2181       | Carbon Hydrogen Bond         |                                        |                                   |
| LIG:C - GLY434:O         | 3.3236       | Carbon Hydrogen Bond         |                                        |                                   |
| LEU171:CD2 - LIG         | 3.5066       | Hydrophobic (Pi-Sigma)       |                                        |                                   |
| ILE199:CA - LIG          | 3.9907       | Hydrophobic (Pi-Sigma)       |                                        |                                   |
| CYS172:SG - LIG          | 5.1135       | Pi-Sulfur                    |                                        |                                   |
| CYS397:SG - LIG          | 5.9264       | Pi-Sulfur                    |                                        |                                   |
| MET436:SD - LIG          | 5.8185       | Pi-Sulfur                    |                                        |                                   |
| TYR398 - LIG             | 3.8319       | Hydrophobic (Pi-Pi Stacked)  |                                        |                                   |
| TYR398 - LIG             | 3.8750       | Hydrophobic (Pi-Pi Stacked)  |                                        |                                   |
| TYR326 - LIG             | 5.0666       | Hydrophobic (Pi-Pi T-shaped) |                                        |                                   |
| LIG:C - LEU171           | 5.0268       | Hydrophobic (Alkyl)          |                                        |                                   |
| LIG:C - ILE199           | 4.1227       | Hydrophobic (Alkyl)          |                                        |                                   |
| TYR326 - LIG:C           | 4.6830       | Hydrophobic (Pi-Alkyl)       |                                        |                                   |
